# Supplementary material for: Identifying Atrial Fibrillation using Integrated Methods of 12-lead and Single-lead ECG during Normal Sinus Rhythm based on Artificial Intelligence
Source: Research Square preprint supplement (doi:10.21203/rs.3.rs-7462212/v1), 2025-10-08
Supplement: Supplementary file 2 [file 9d3bb75b8d73276f58cf2c12.docx]

**Supplementary Methods 1.** Descriptions of LSTM, Resnet-50, and Attention Resnet-50

Long short-term memory (LSTM) represents a recurrent neural network (RNN) architecture specifically engineered to proficiently manage sequential data. 1 LSTM is specifically engineered to mitigate the issue of long-term dependencies by utilizing the output vector as input. This model is primarily used to analyze time series data.

Resnet-50 is a model based on a convolutional neural network (CNN), which is distinguished by its integration of residual learning to facilitate the training networks with increased depth. 2 This architecture, comprising 50 layers, includes shortcut connections that effectively propagate inputs to deeper layers. This feature aims to mitigate the degradation problem often encountered in conventional deep neural networks.

The improved version, the Attention Resnet-50 model, incorporates an attention mechanism to prioritize important features and exclude less pertinent information.3 This enhancement aims to boost performance in tasks that require concentrated processing.

**Supplementary references**

[1] Hochreiter S, Schmidhuber J. Long short-term memory. Neural Comput. 1997;9(8):1735–1780.

[2] K. He, X. Zhang, S. Ren and J. Sun, "Deep Residual Learning for Image Recognition,"2016 IEEE Conference on Computer Vision and Pattern Recognition (CVPR), Las Vegas, NV, USA. 2016;770-778.

[3] Stephen, A. Punitha, A. Chandrasekar, A. Designing self attention-based ResNet architecture for rice leaf disease classification. *Neural Comput. Appl.* 2022;35:6737–6751.
