# Supplementary figures and images for: Identifying Atrial Fibrillation using Integrated Methods of 12-lead and Single-lead ECG during Normal Sinus Rhythm based on Artificial Intelligence
Source: Research Square preprint supplement (doi:10.21203/rs.3.rs-7462212/v1), 2025-10-08

**Supplementary Material**

Supplementary Fig.. GUI to the proposed integrated ECG model


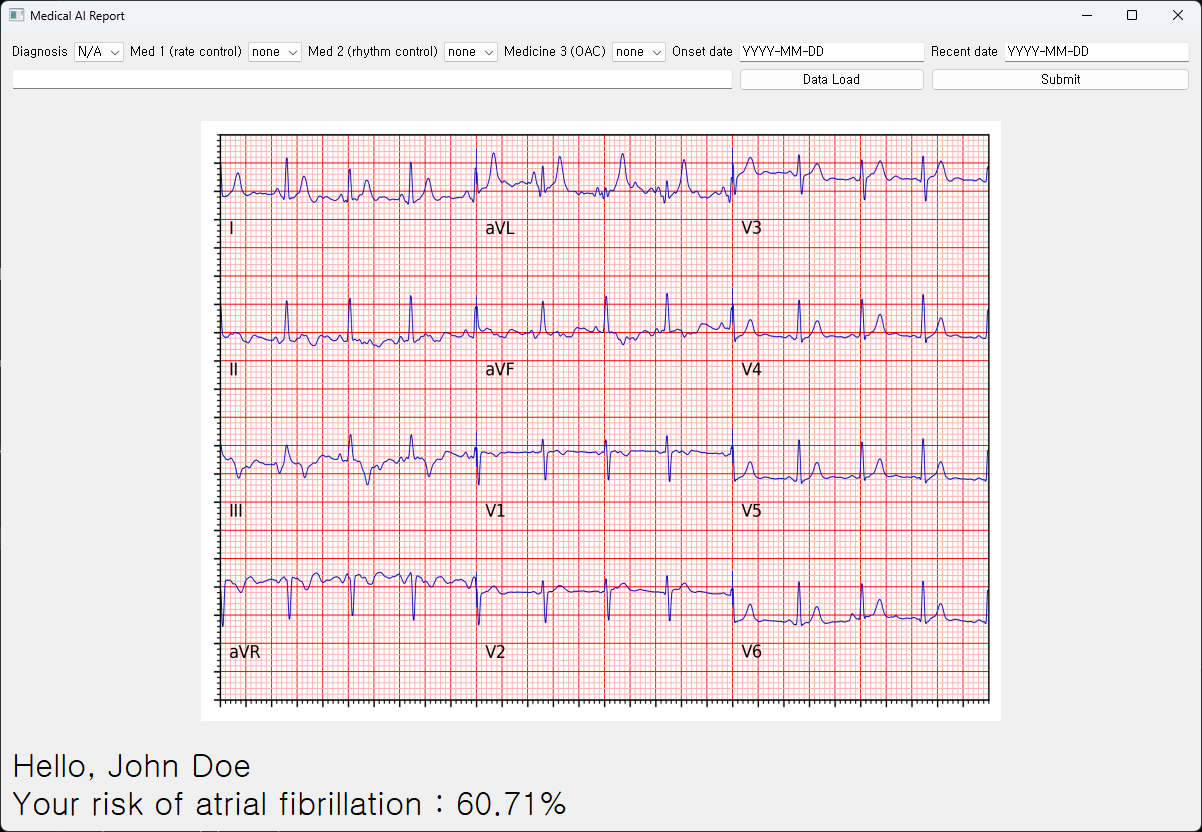

Supplement: Supplementary file 1 [file 2cb831750d636a4918afc12e.docx]
